# Supplementary material
Source: Elsevier journal article supplement (https://comptes-rendus.academie-sciences.fr/chimie/article/10.1016/j.crci.2017.01.006/file/attach/mmc1.pdf)

## Appendix A. Supplementary Data – NMR Spectra

### 4.3 Starting Materials – (18), (25), (30), (34)

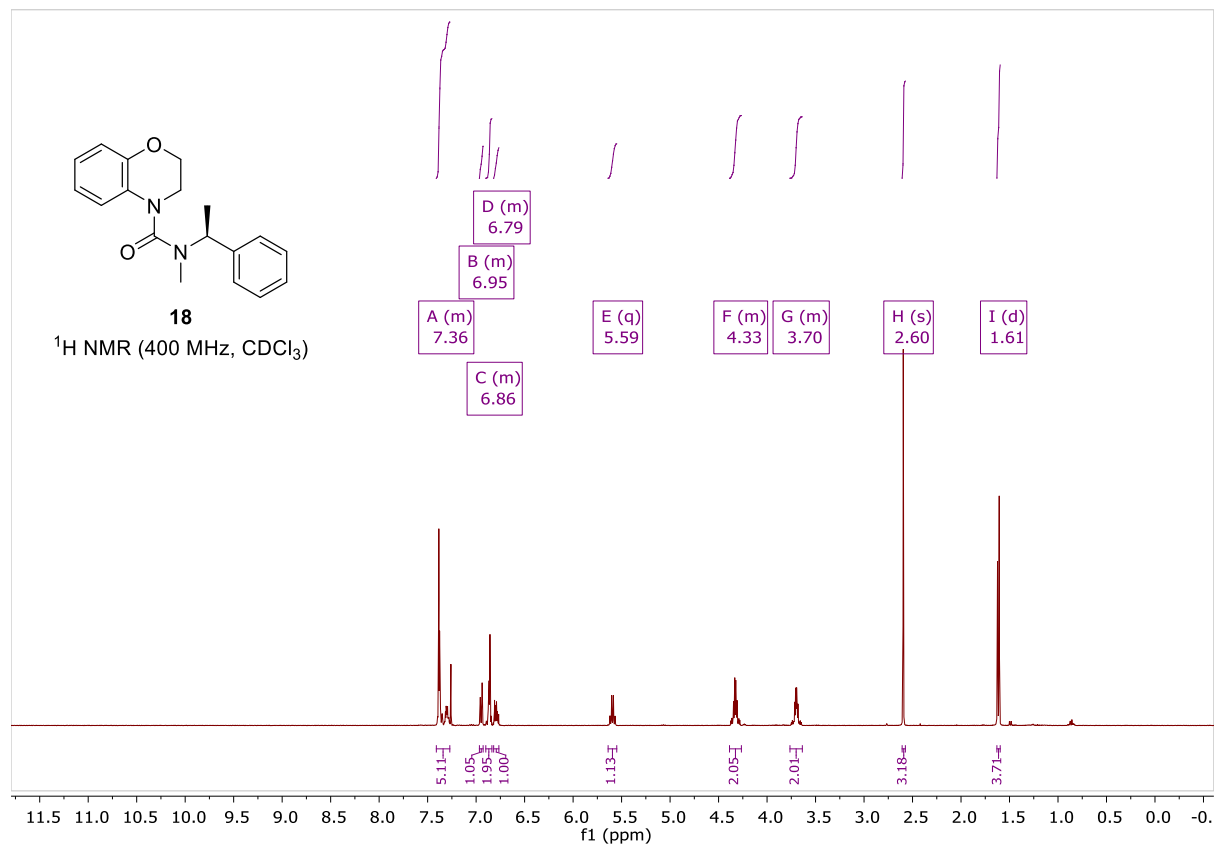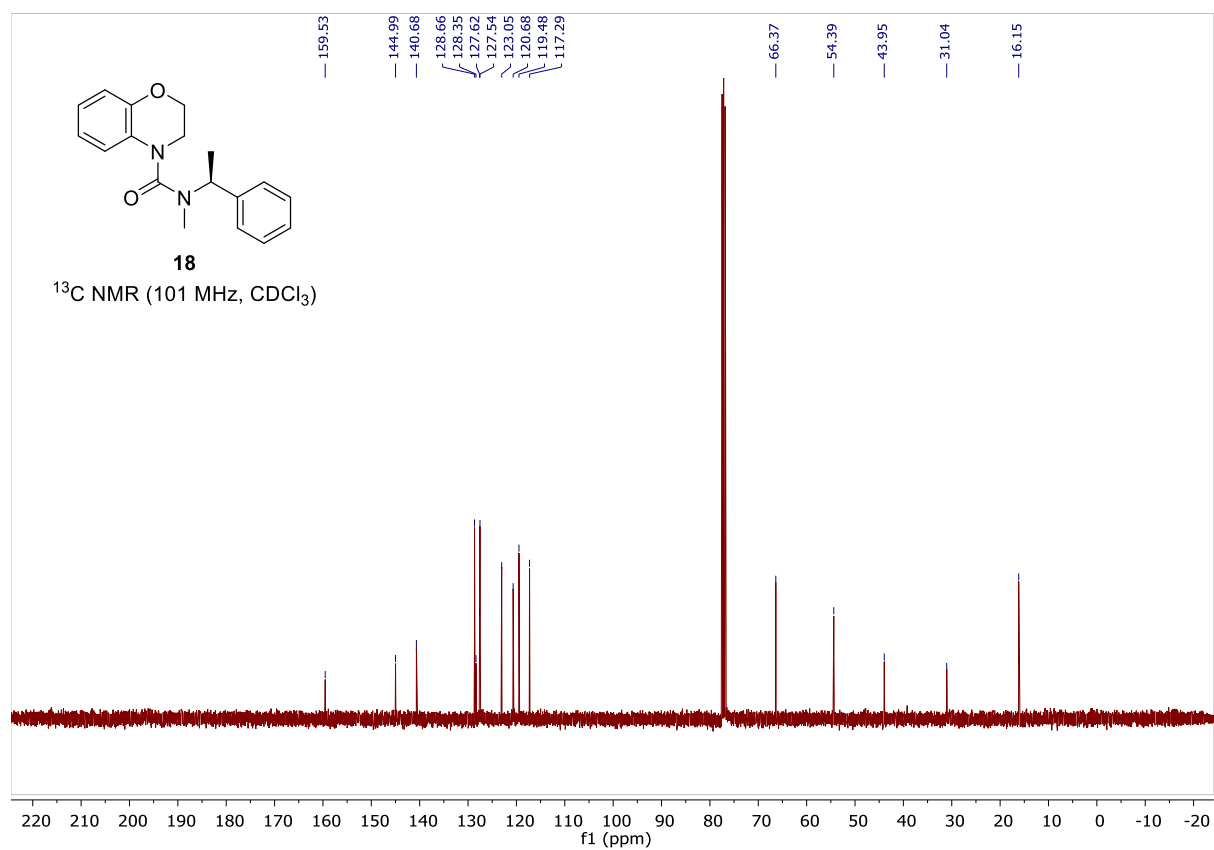

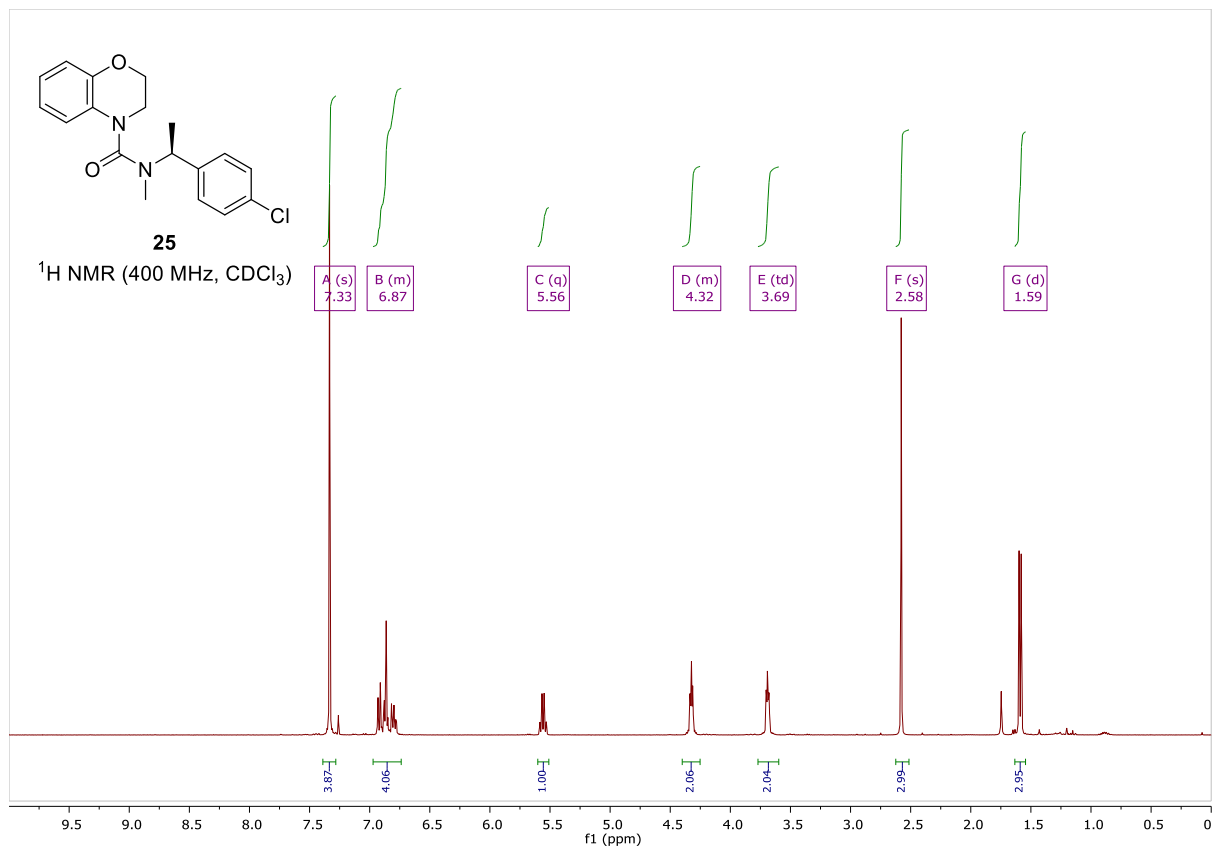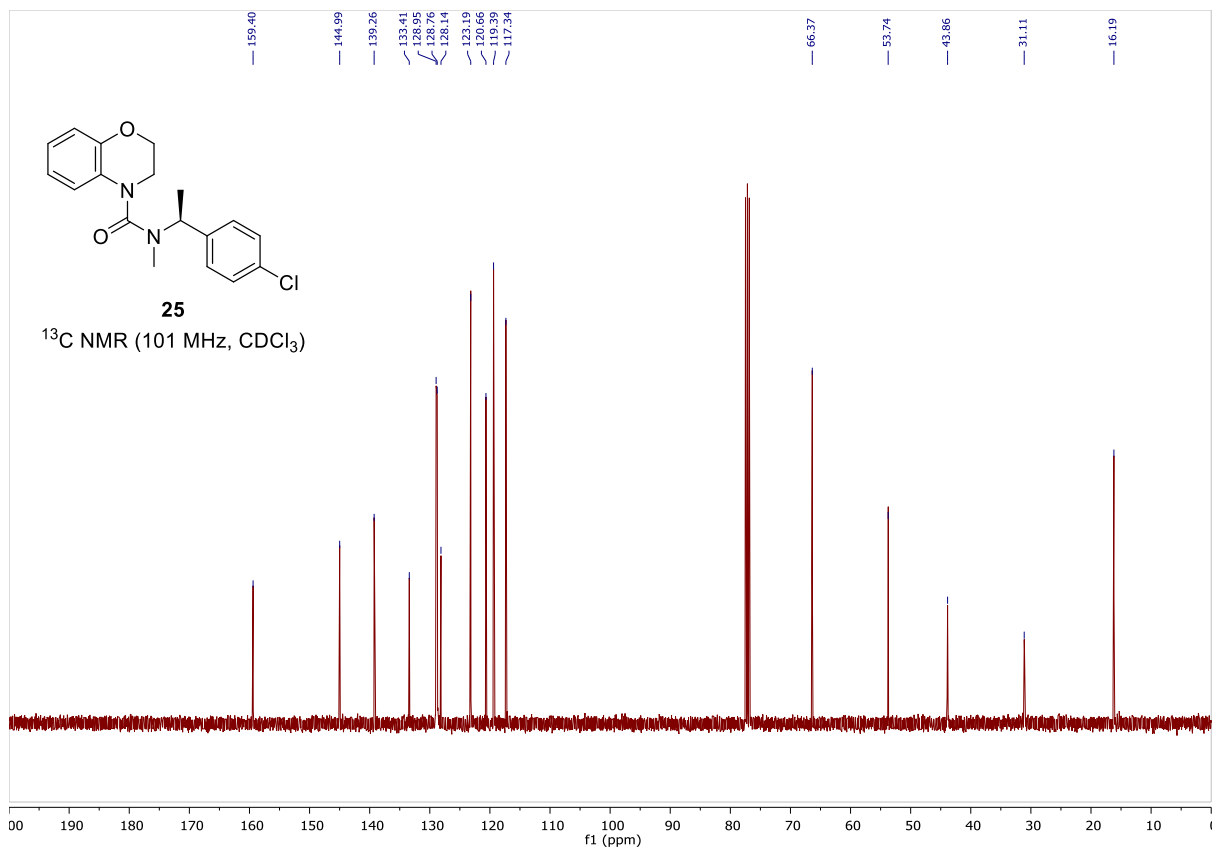

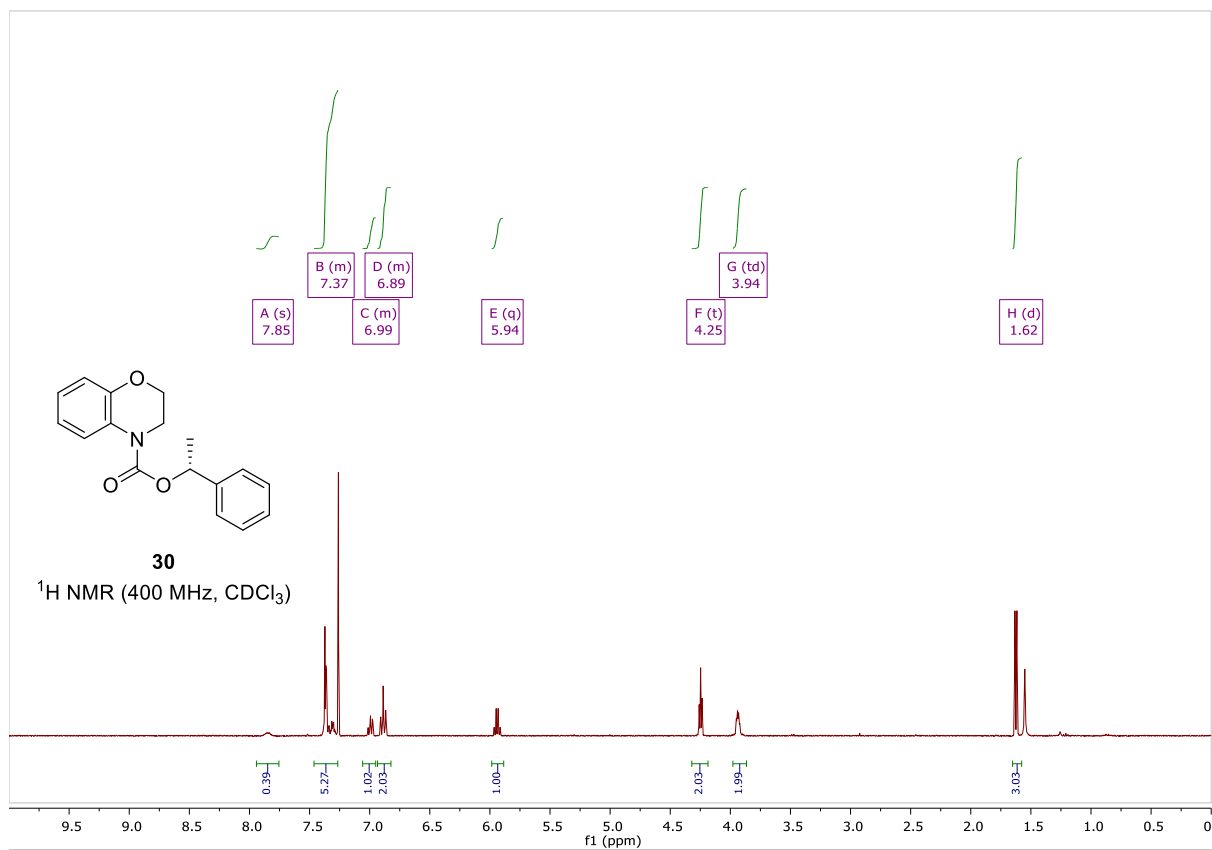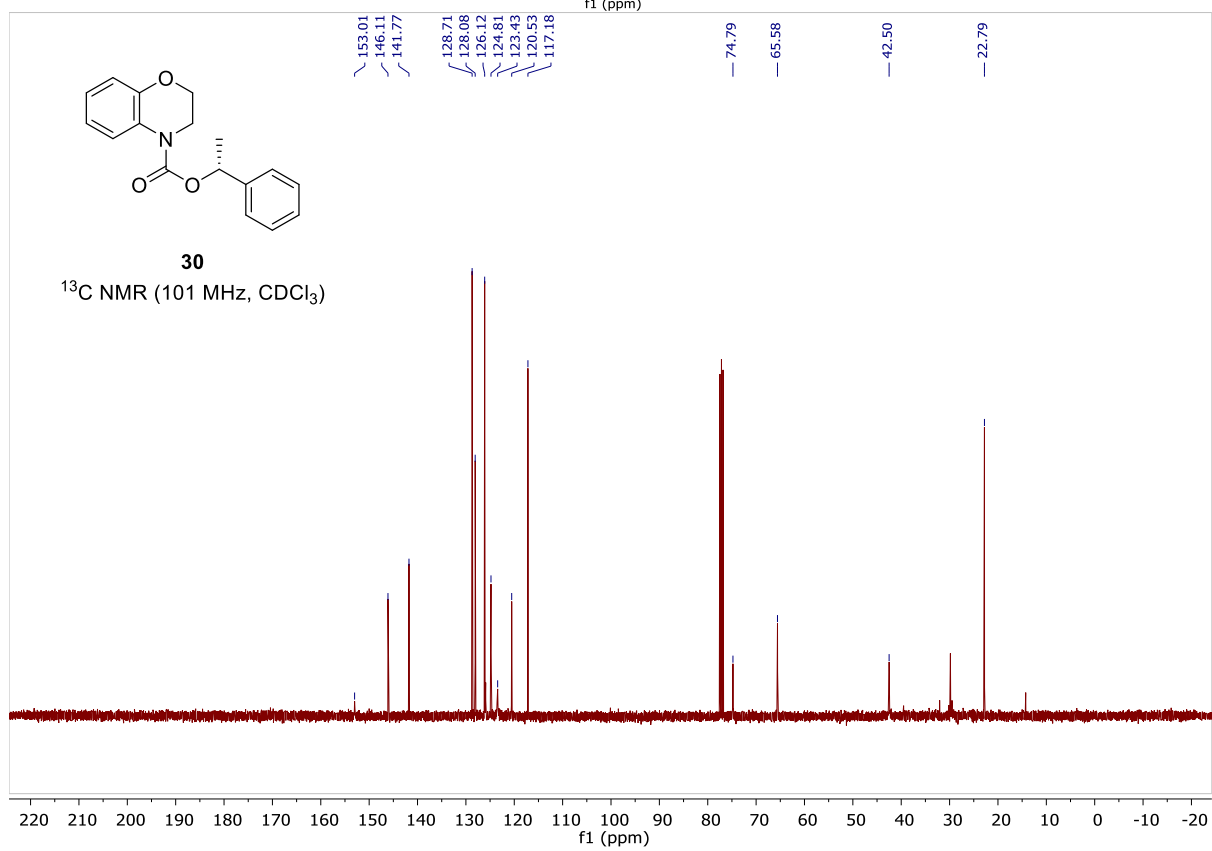

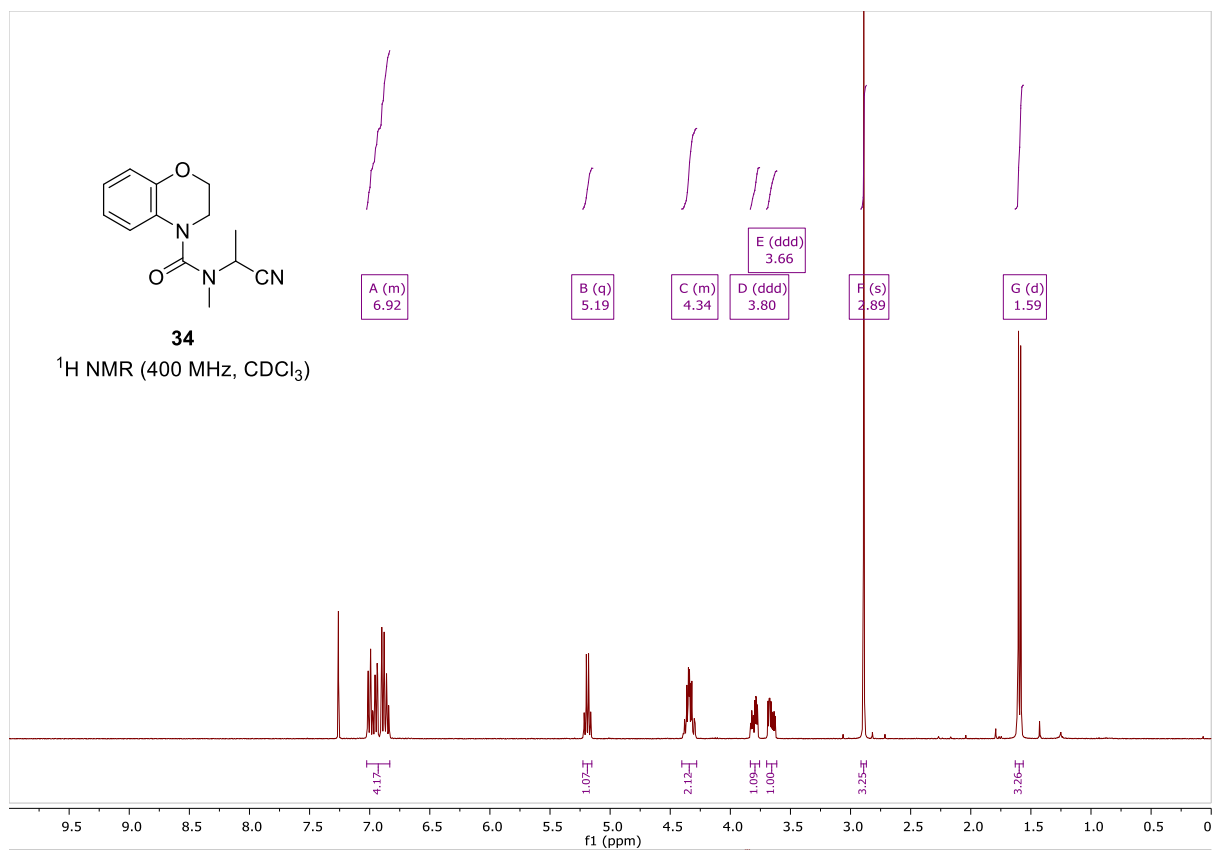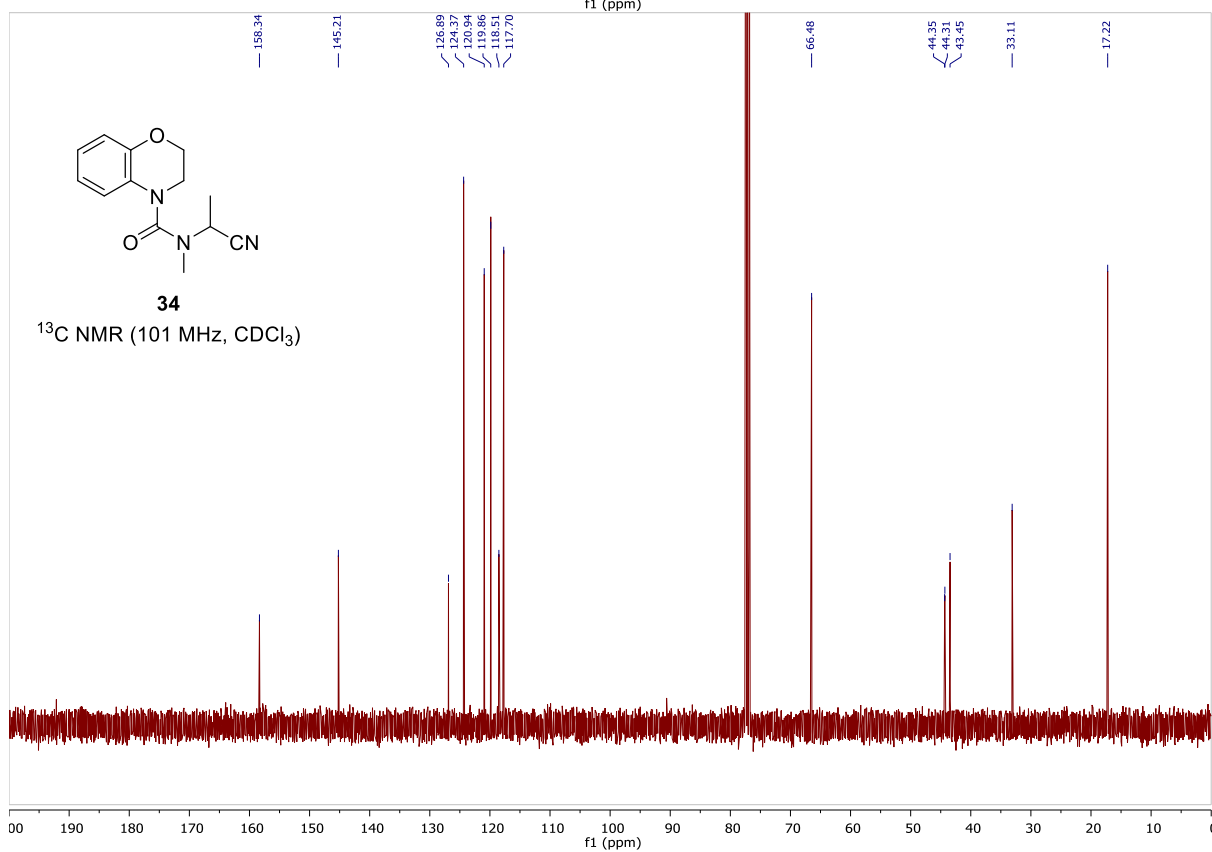

#### 4.4 Vinyl Migration Products – (19), (26), (35), (36)

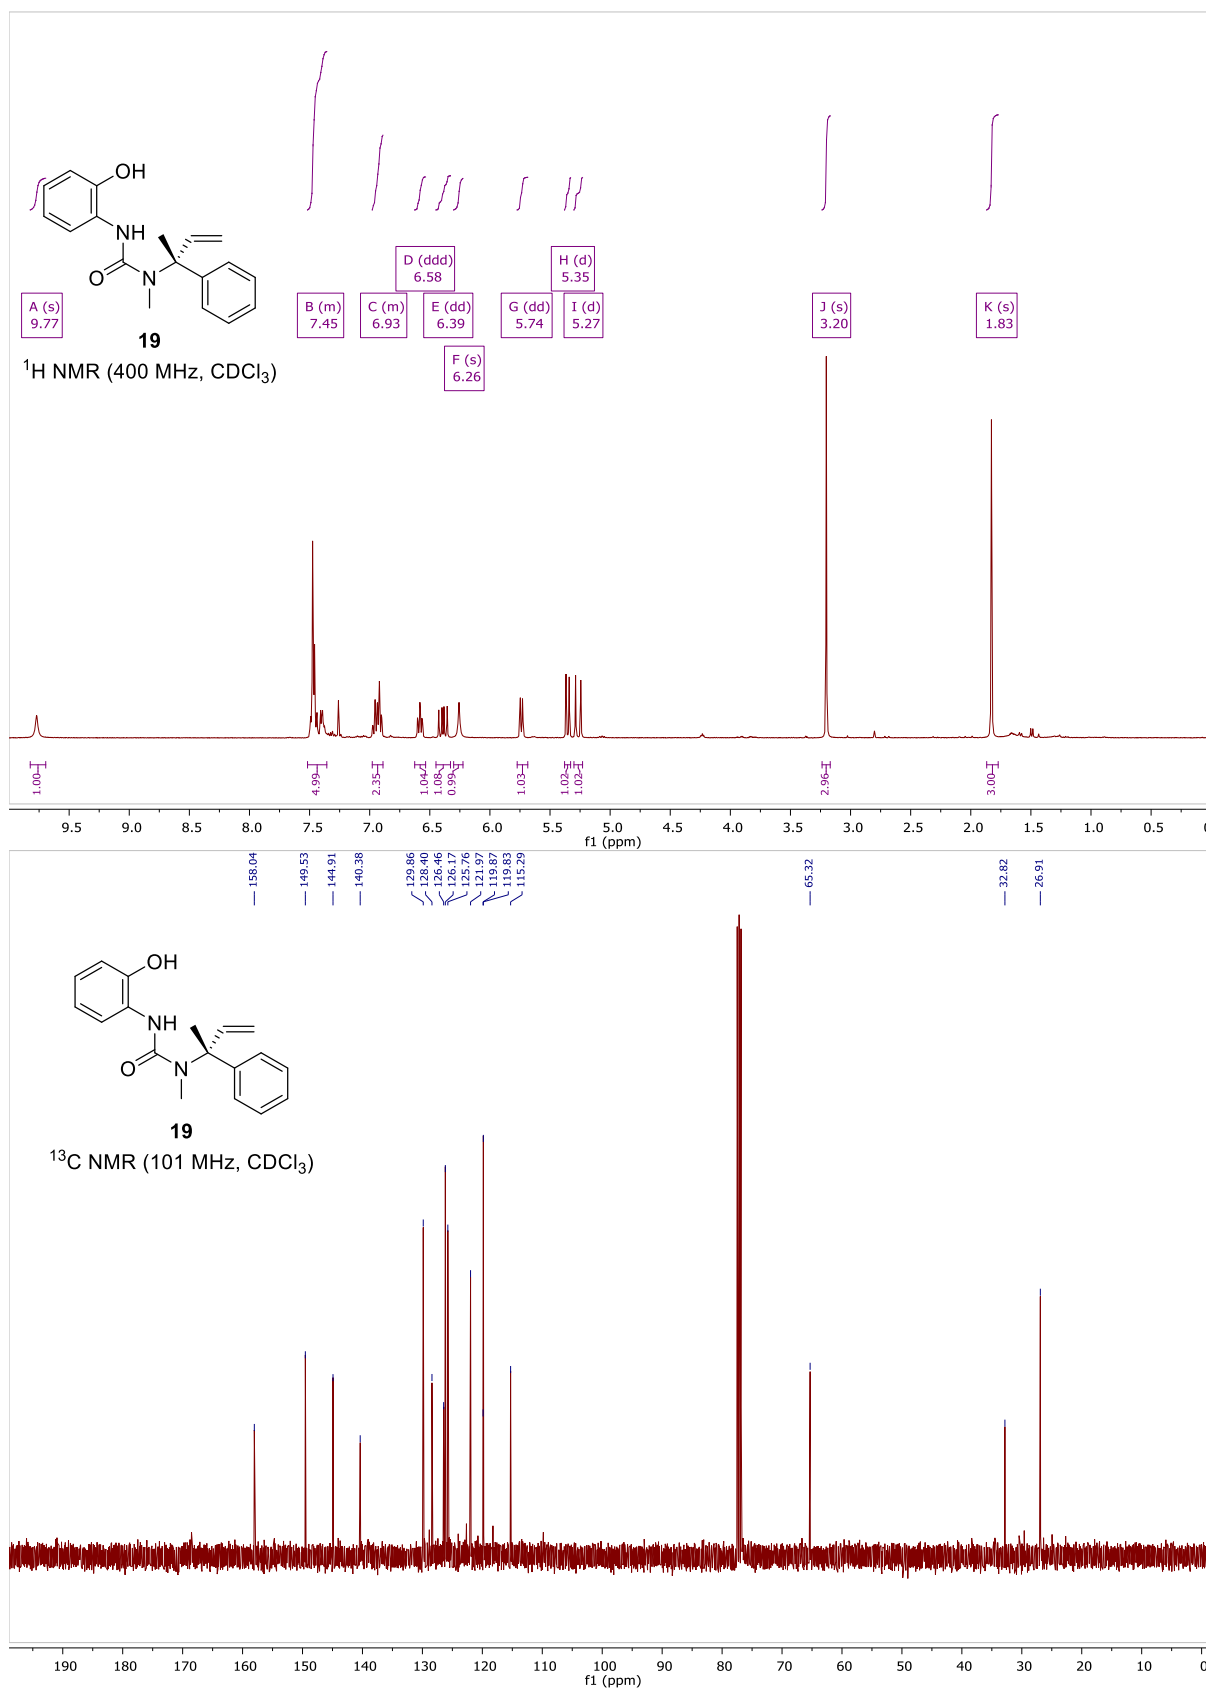

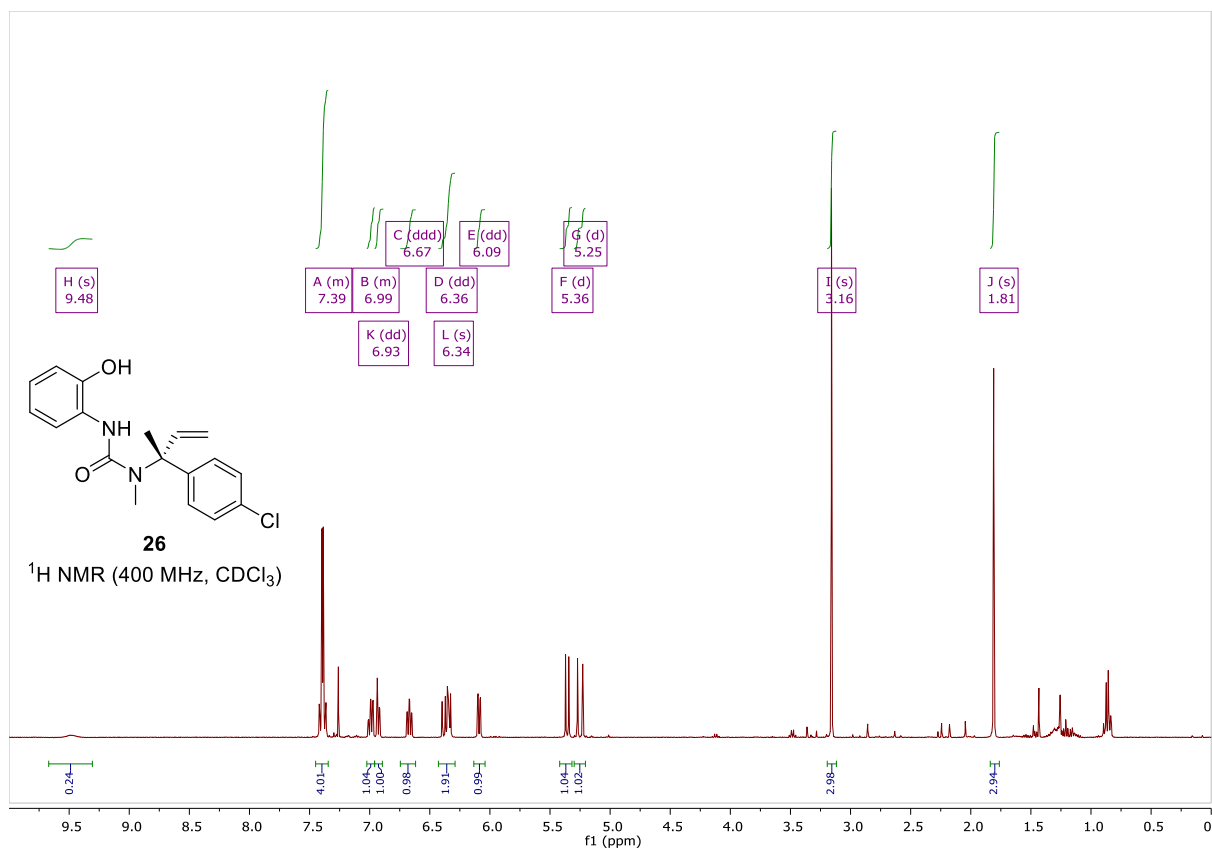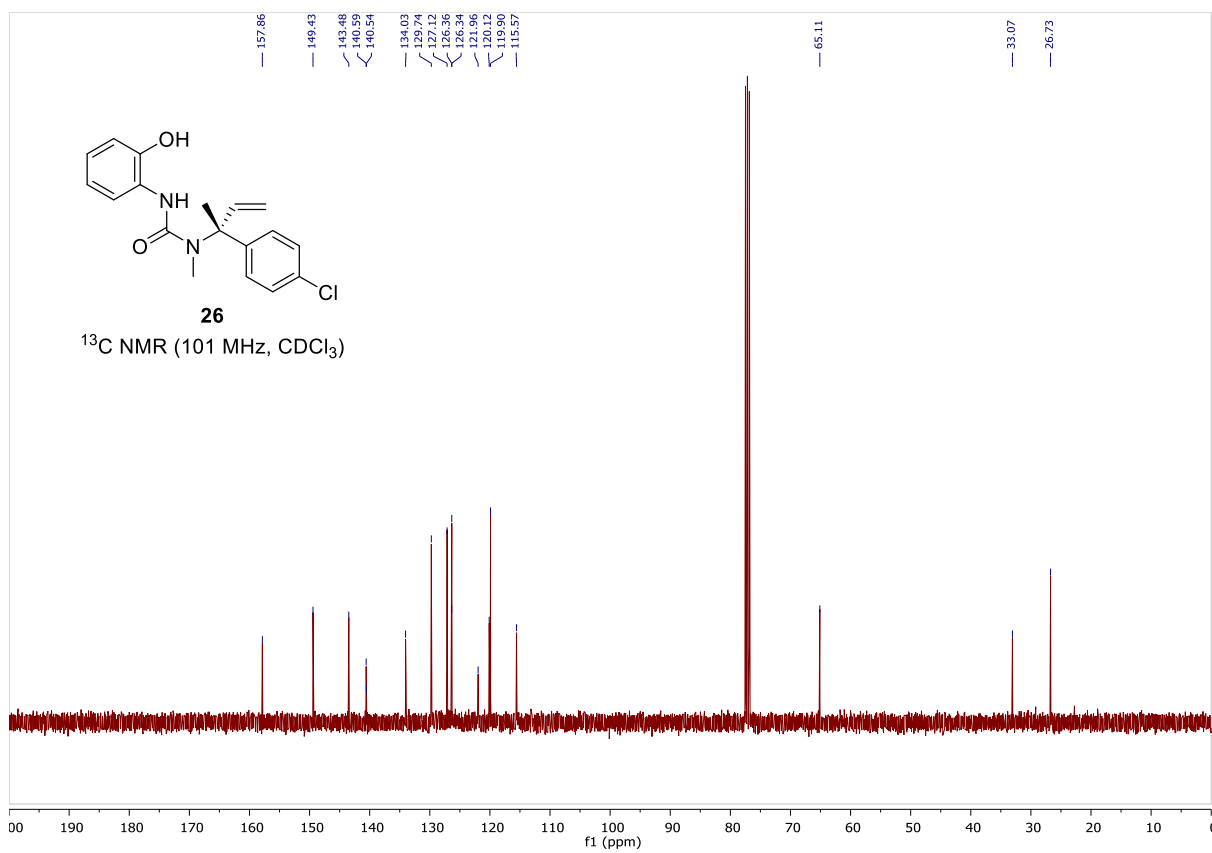

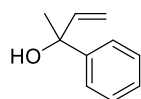

**33**  
<sup>1</sup>H NMR (400 MHz, CDCl<sub>3</sub>)

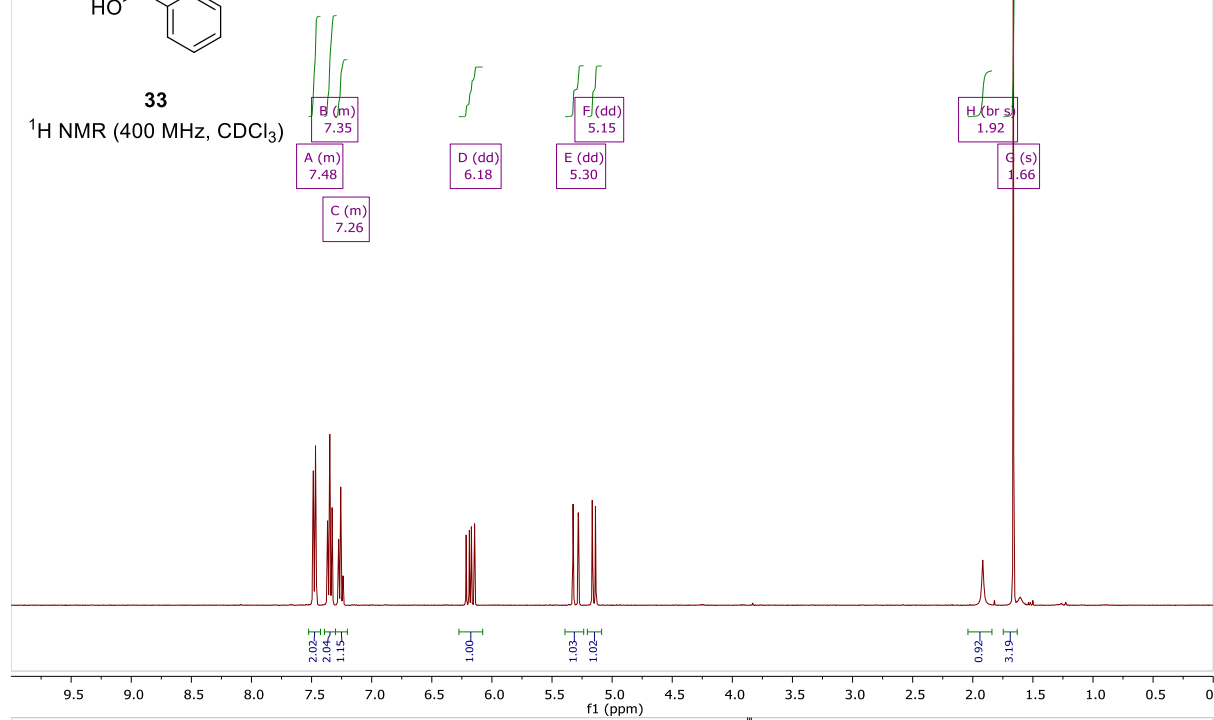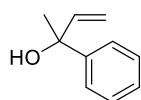

**33**  
<sup>13</sup>C NMR (101 MHz, CDCl<sub>3</sub>)

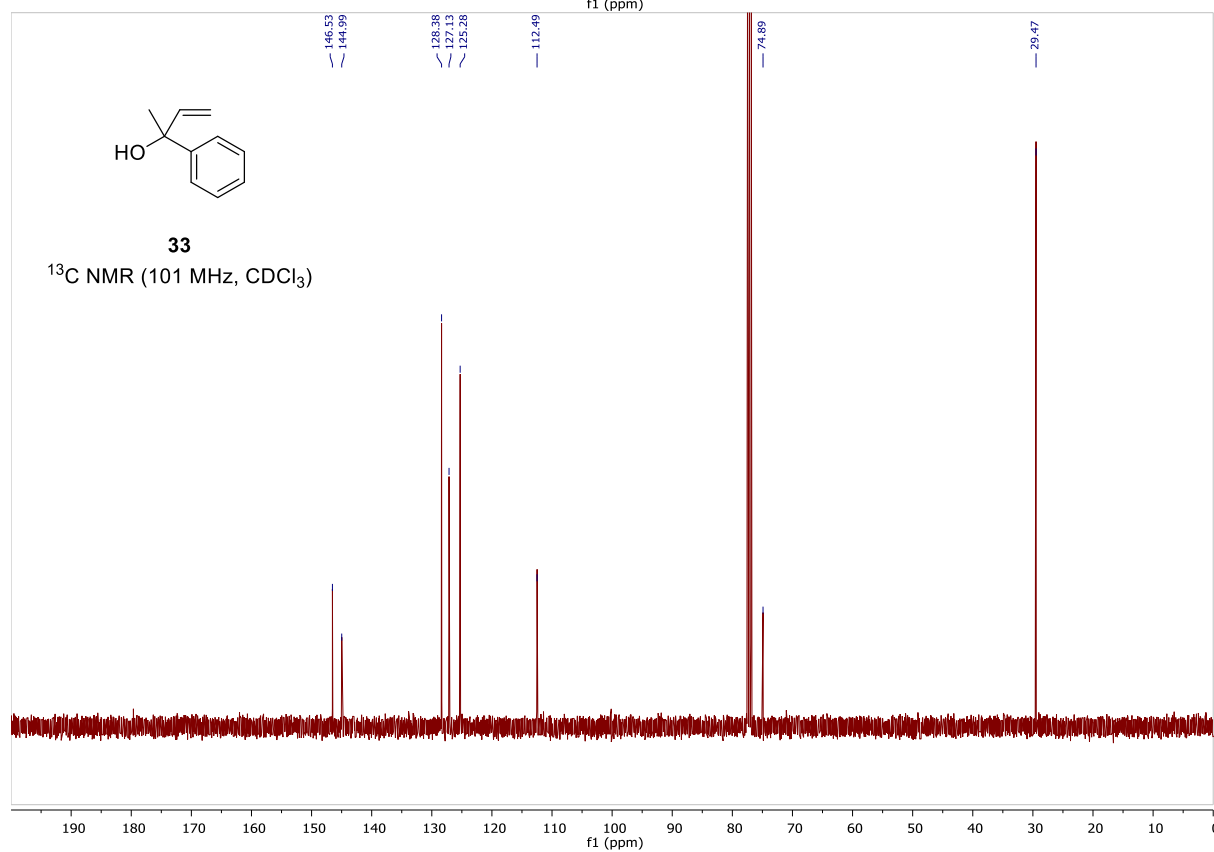

jmr171379\_JMR771\_PROTON\_01

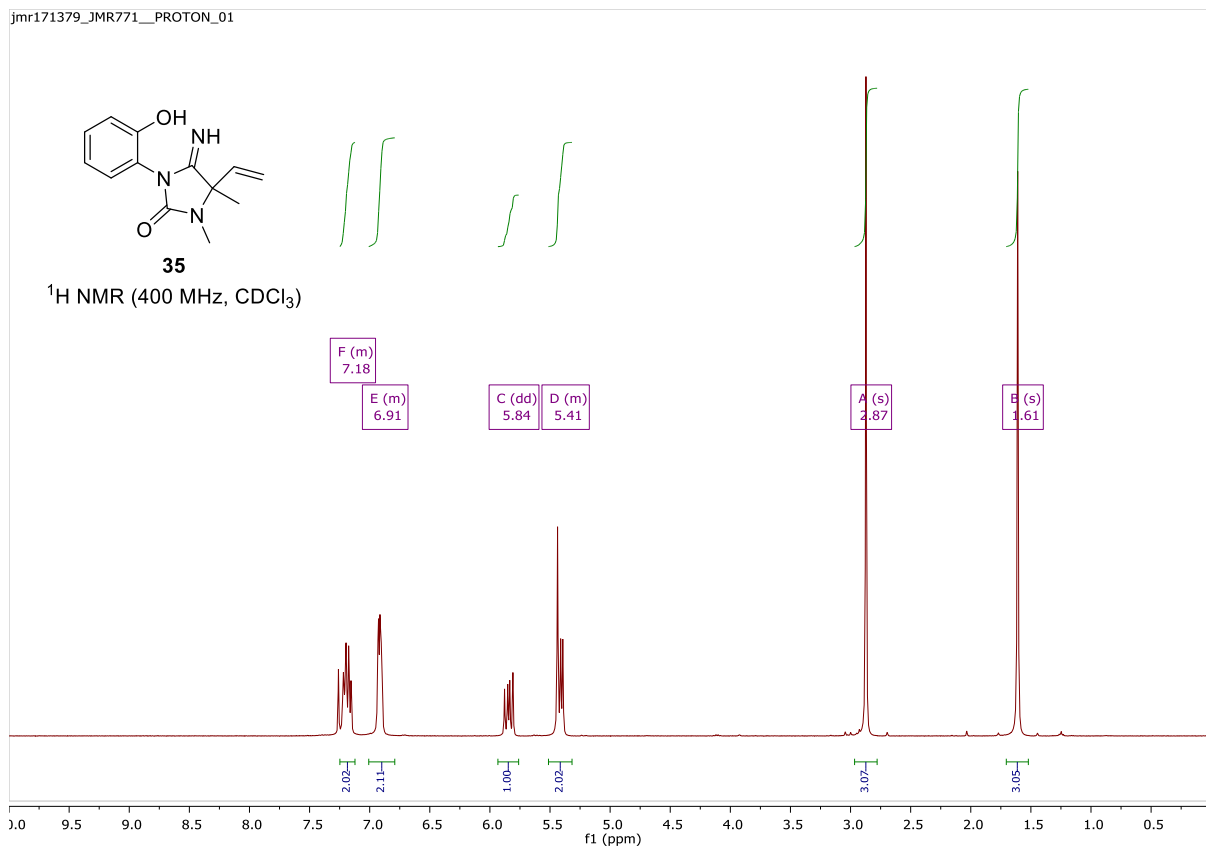

jmr171379\_JMR771\_CARBON\_01

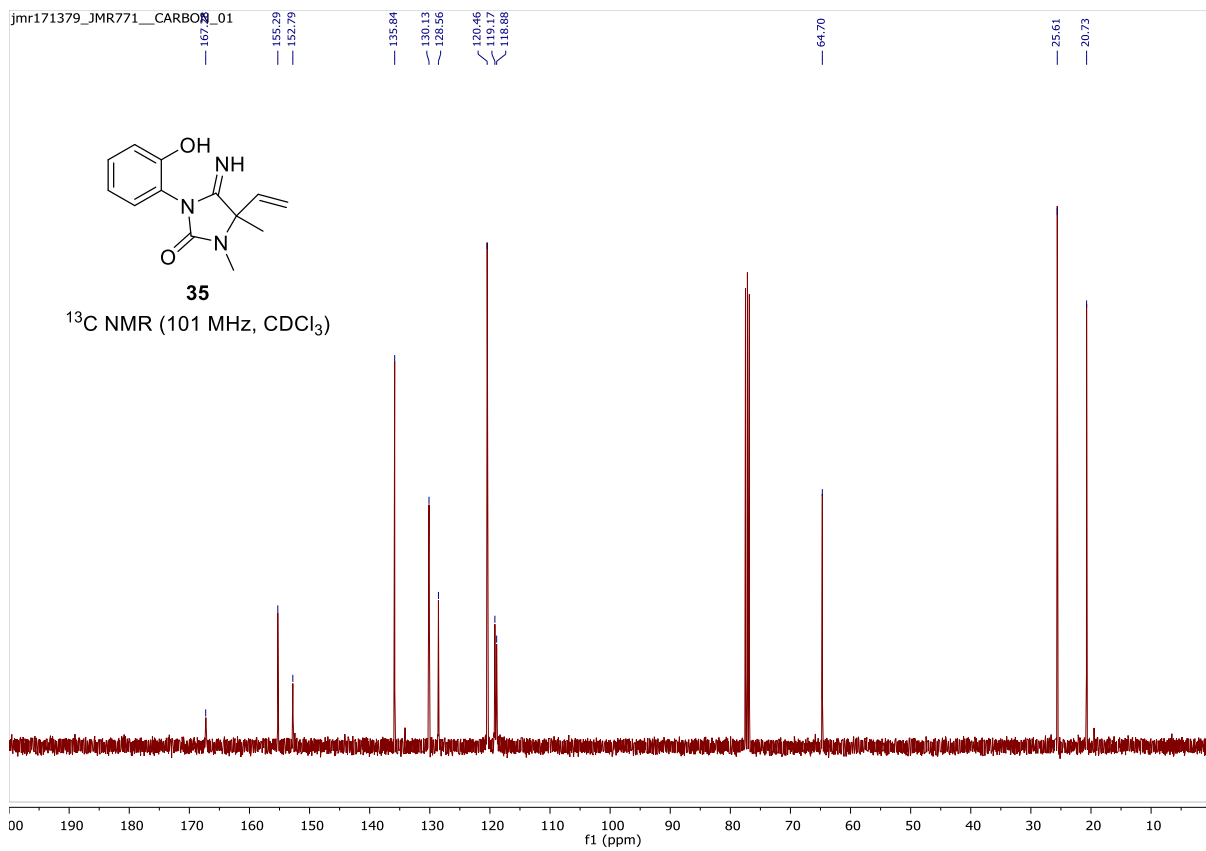



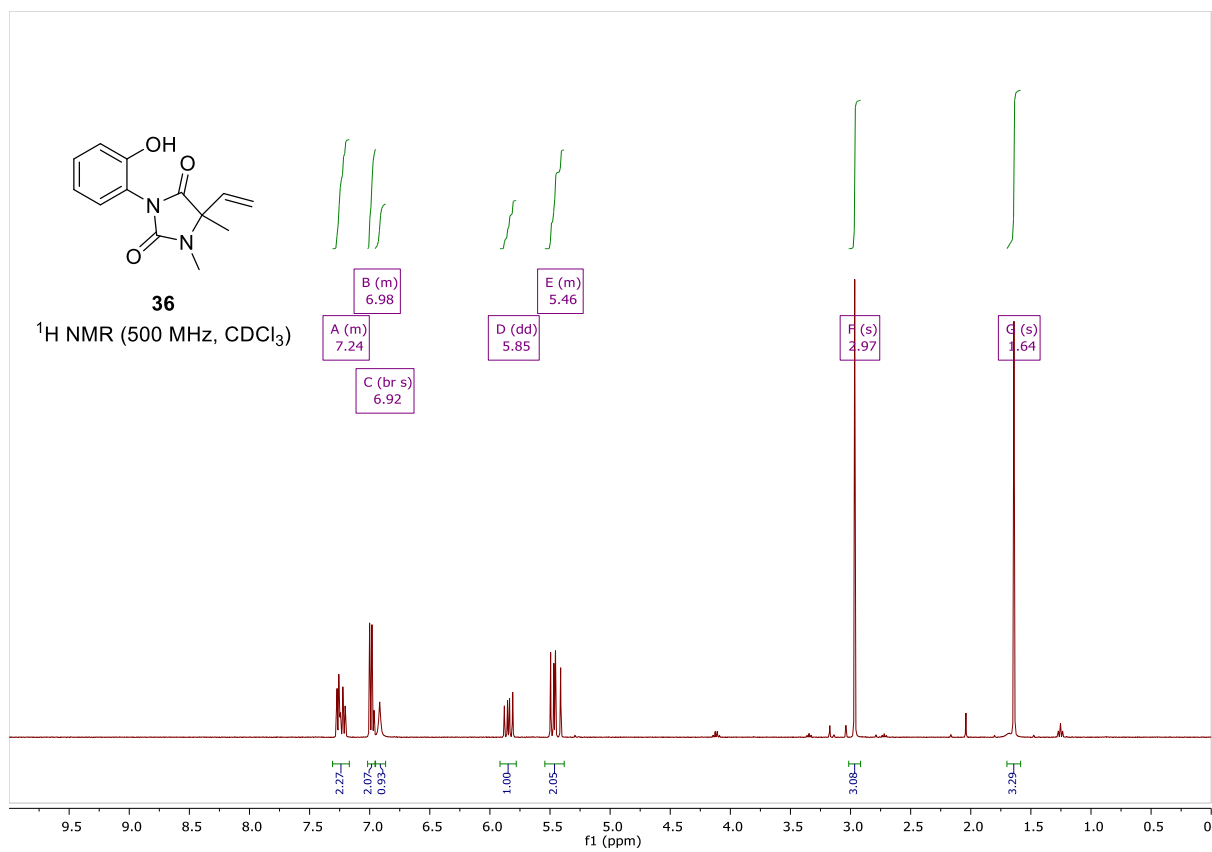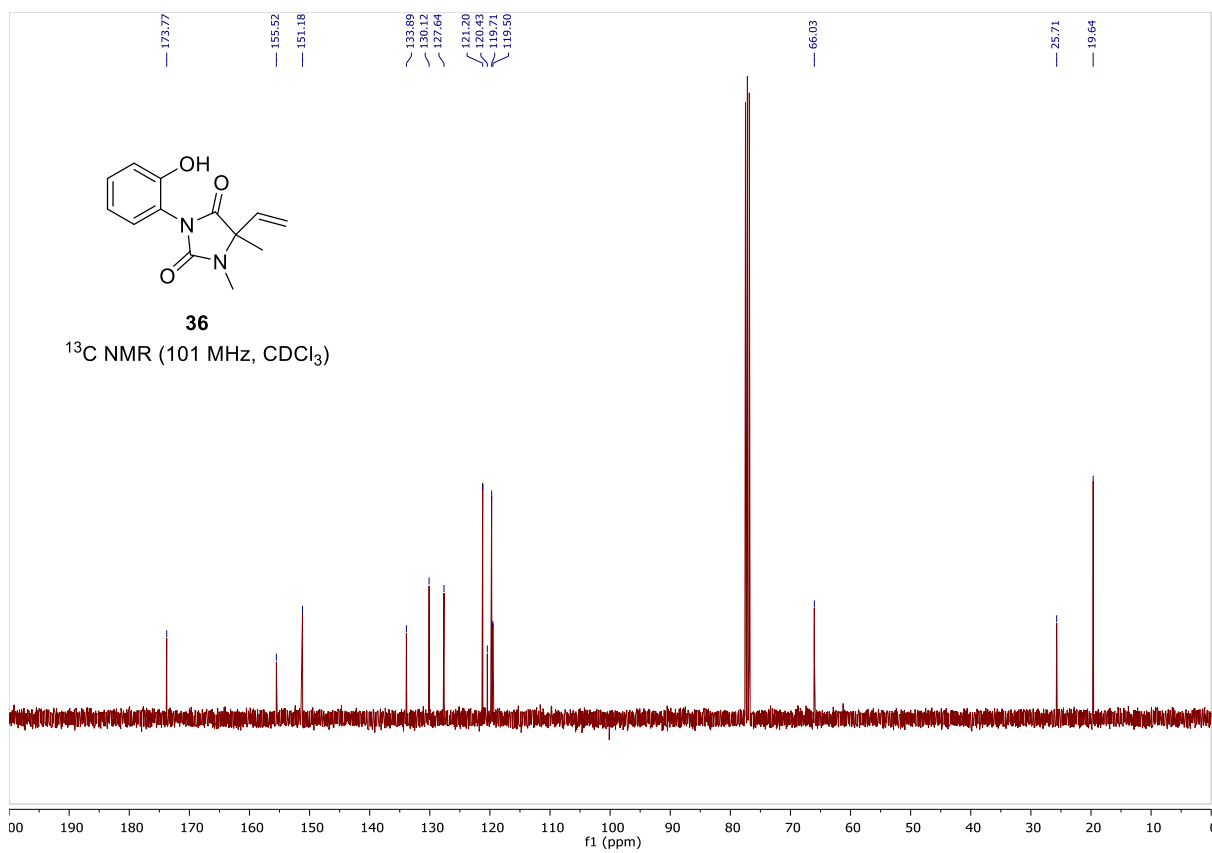

#### 4.5 Side Products – (20), (27)

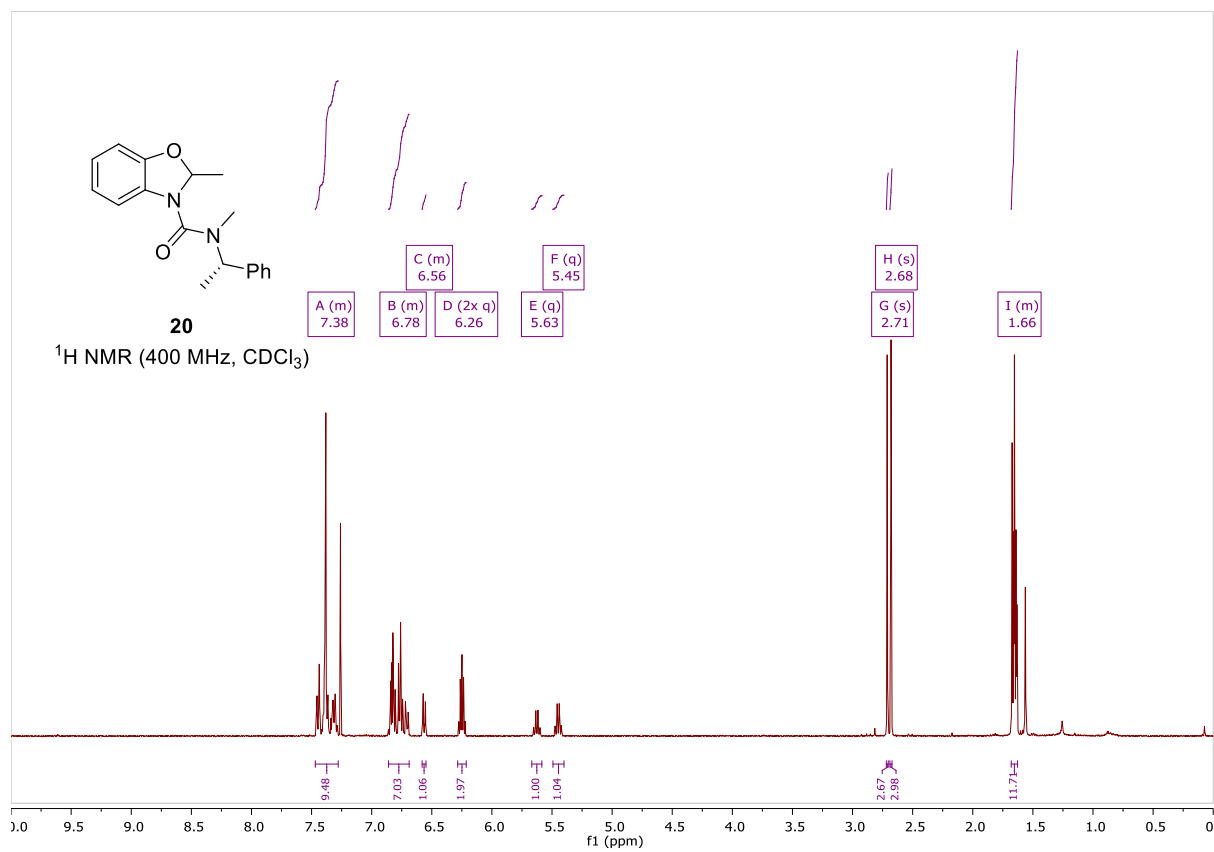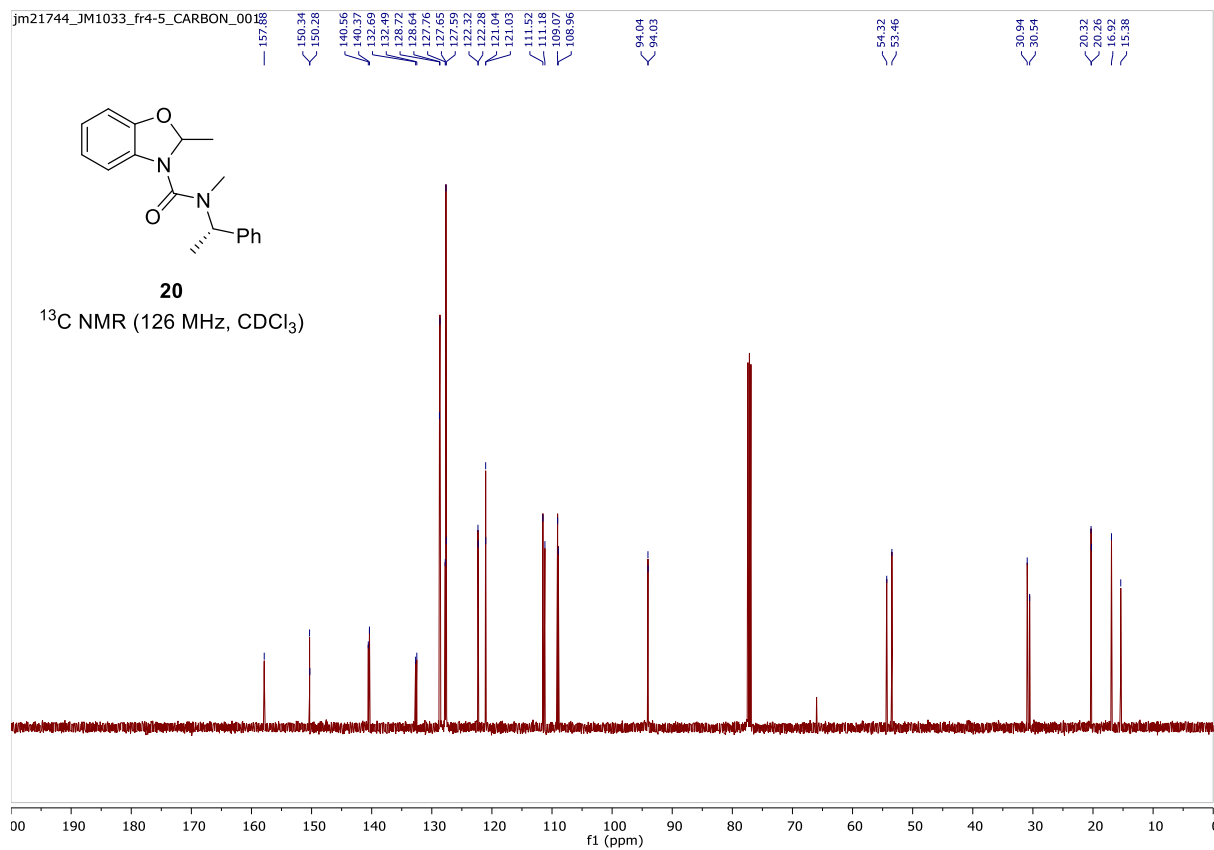

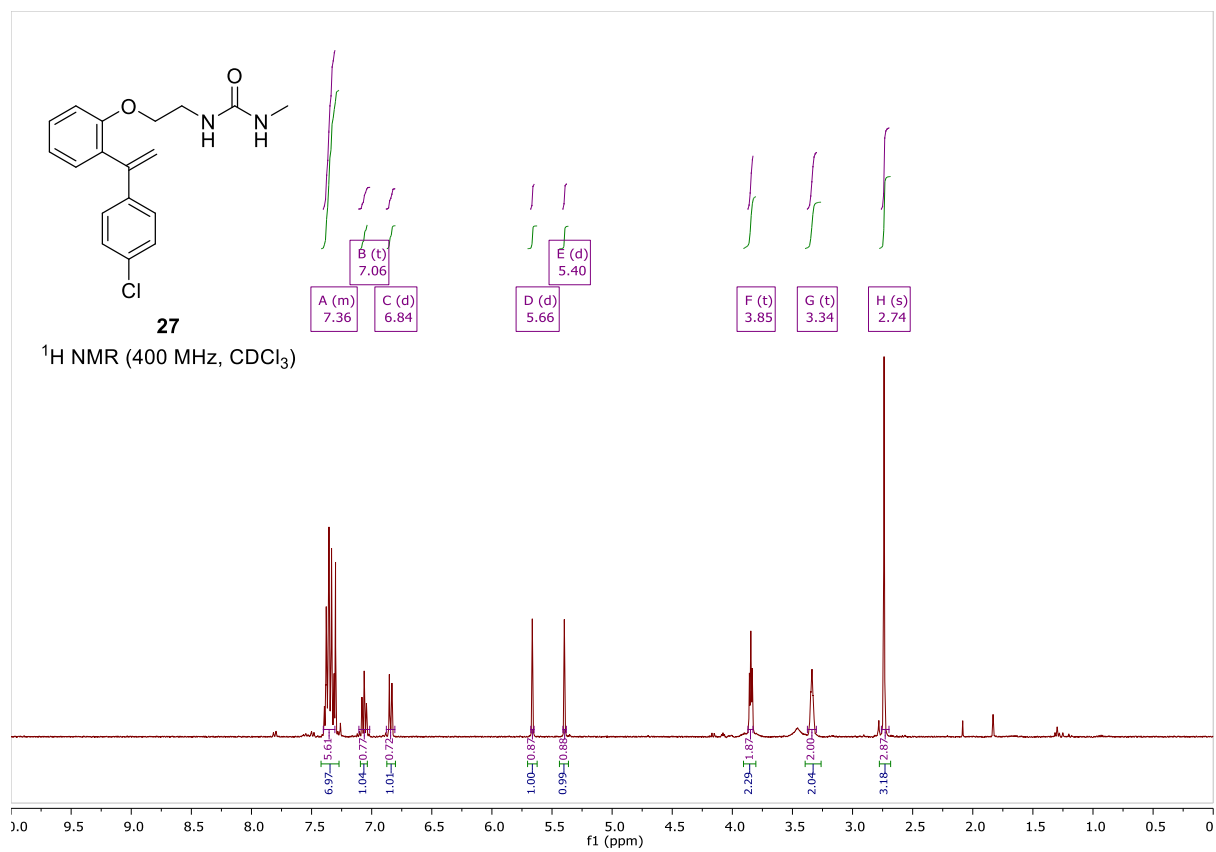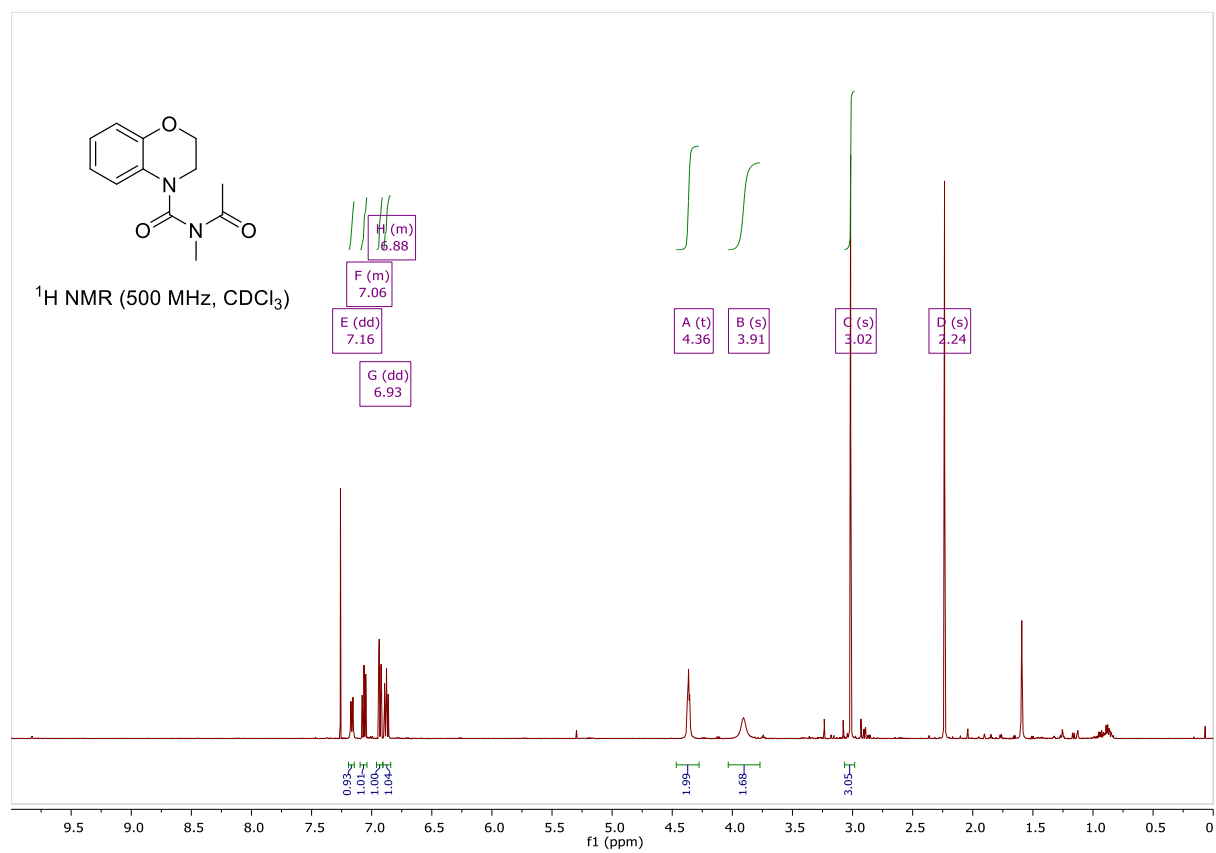

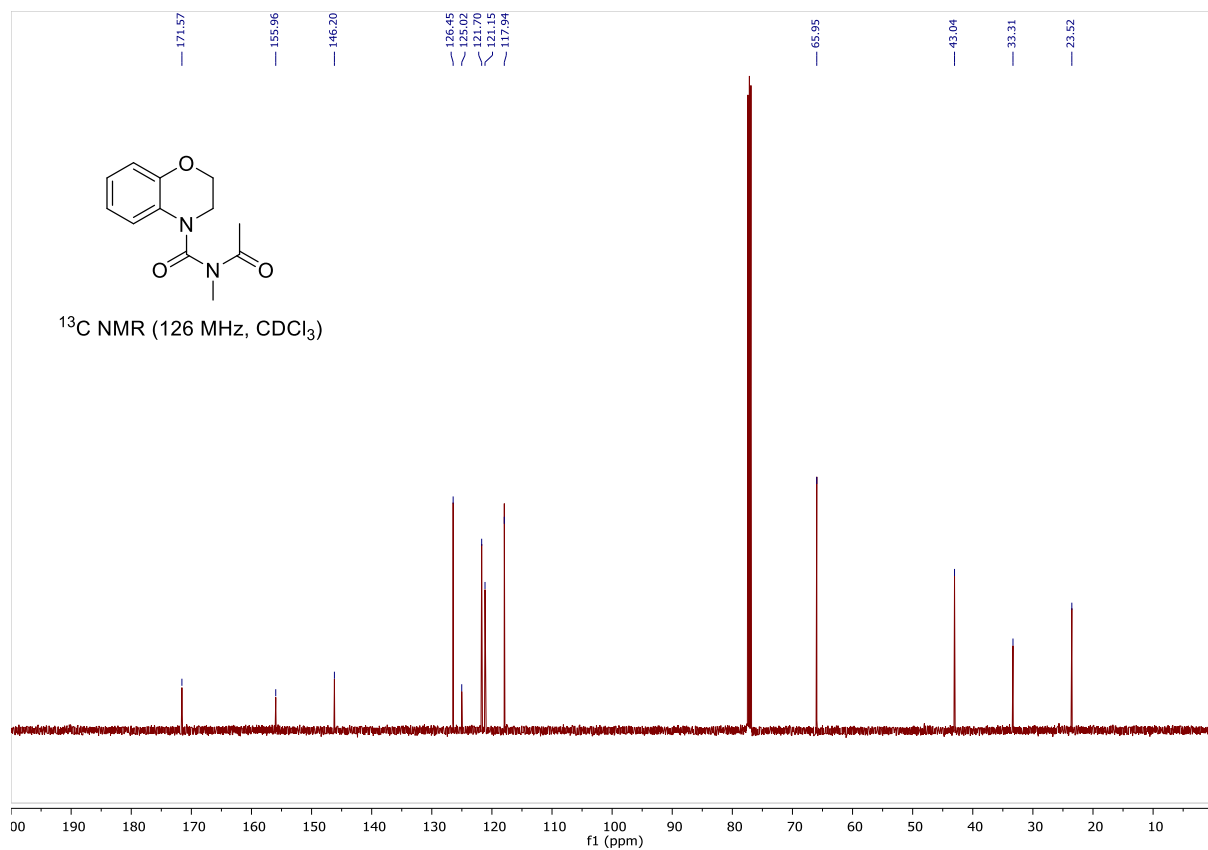

#### 4.6 Methanolysis Products – (28), (29)

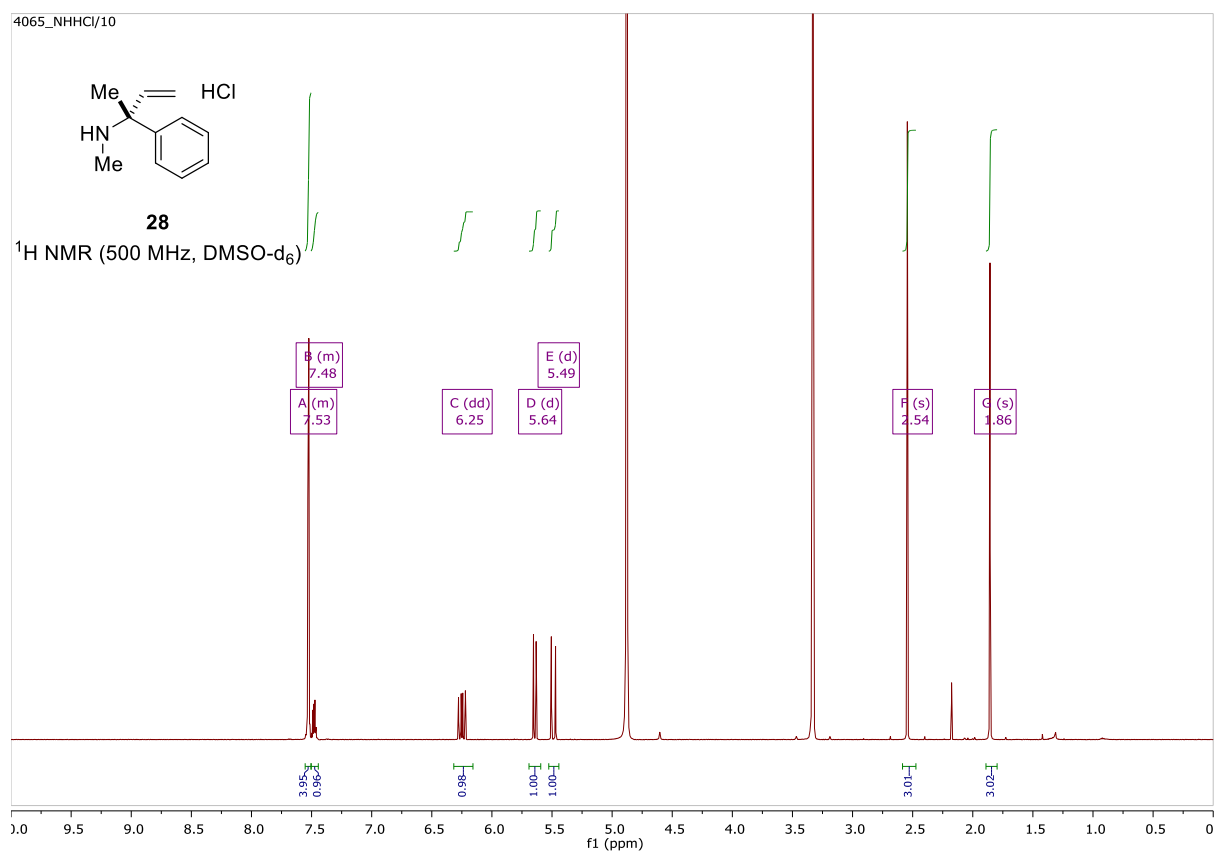

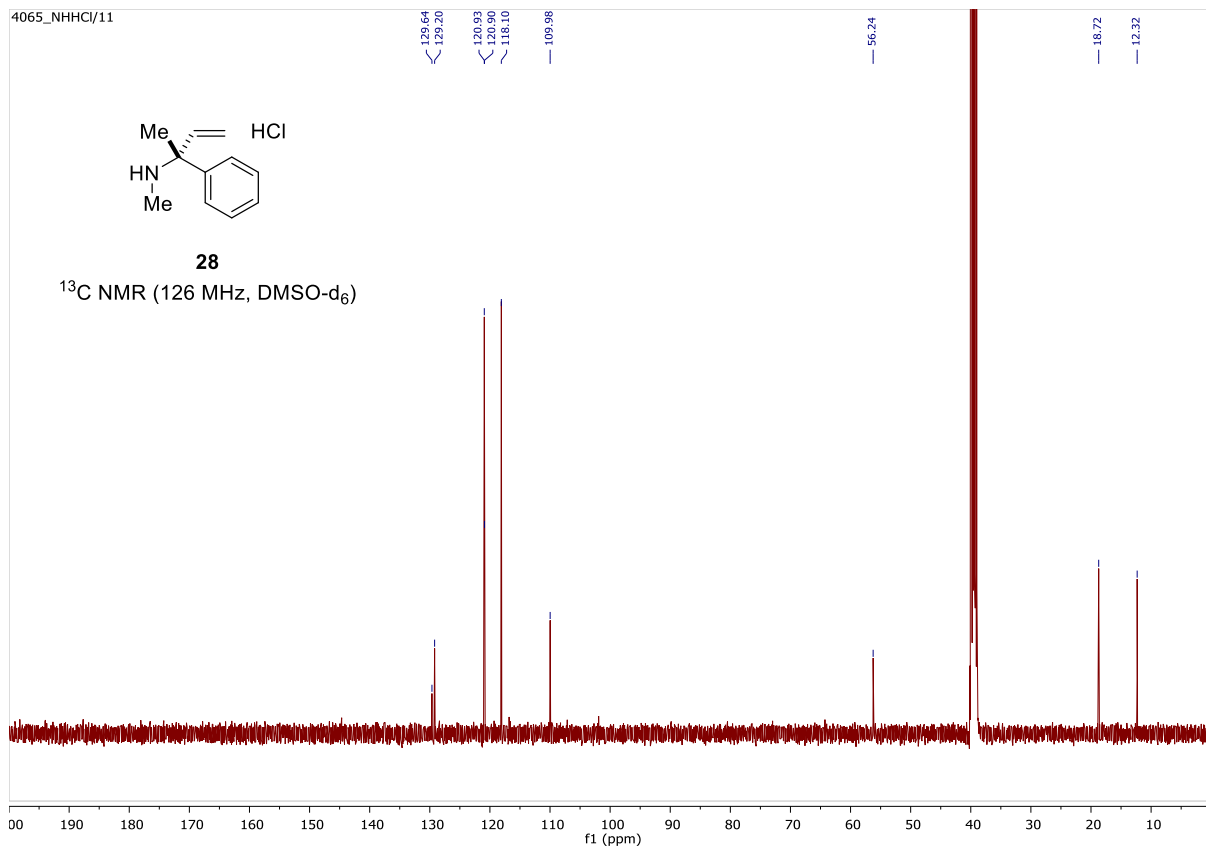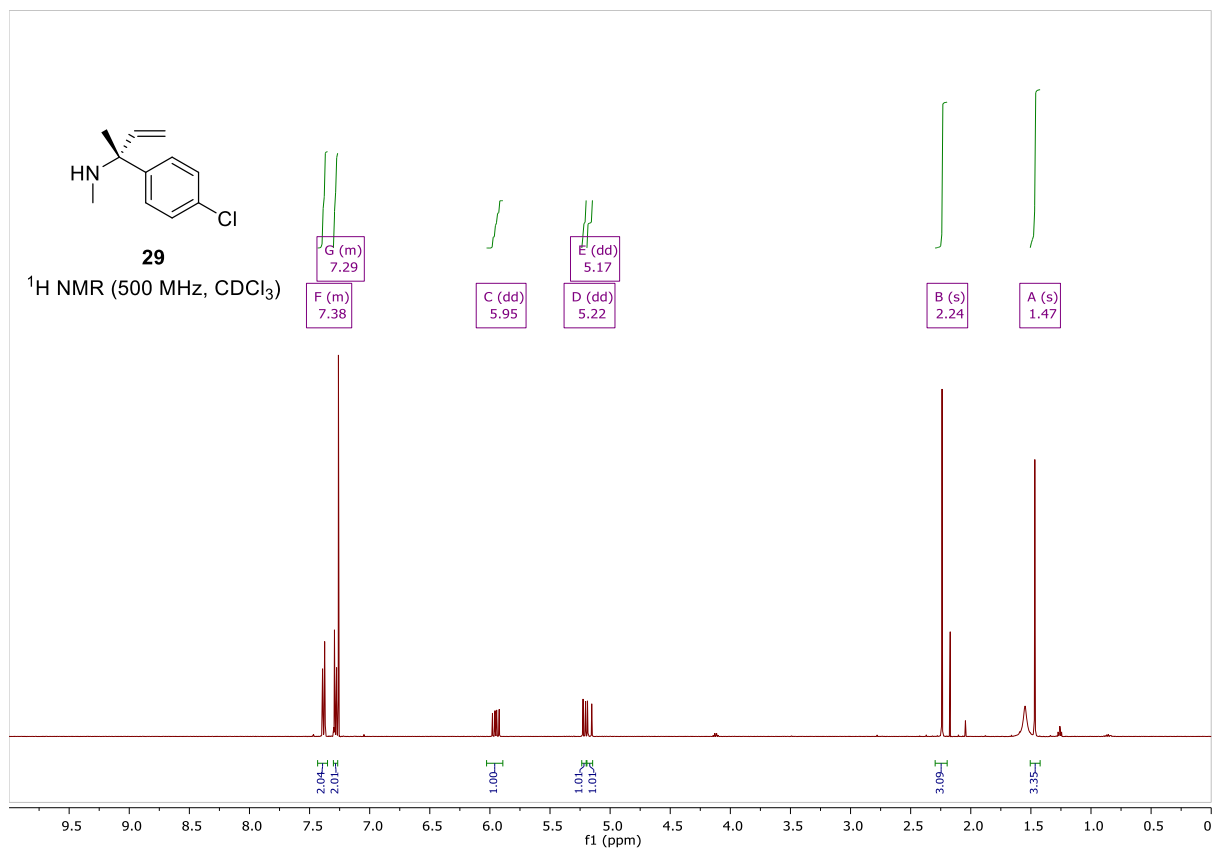

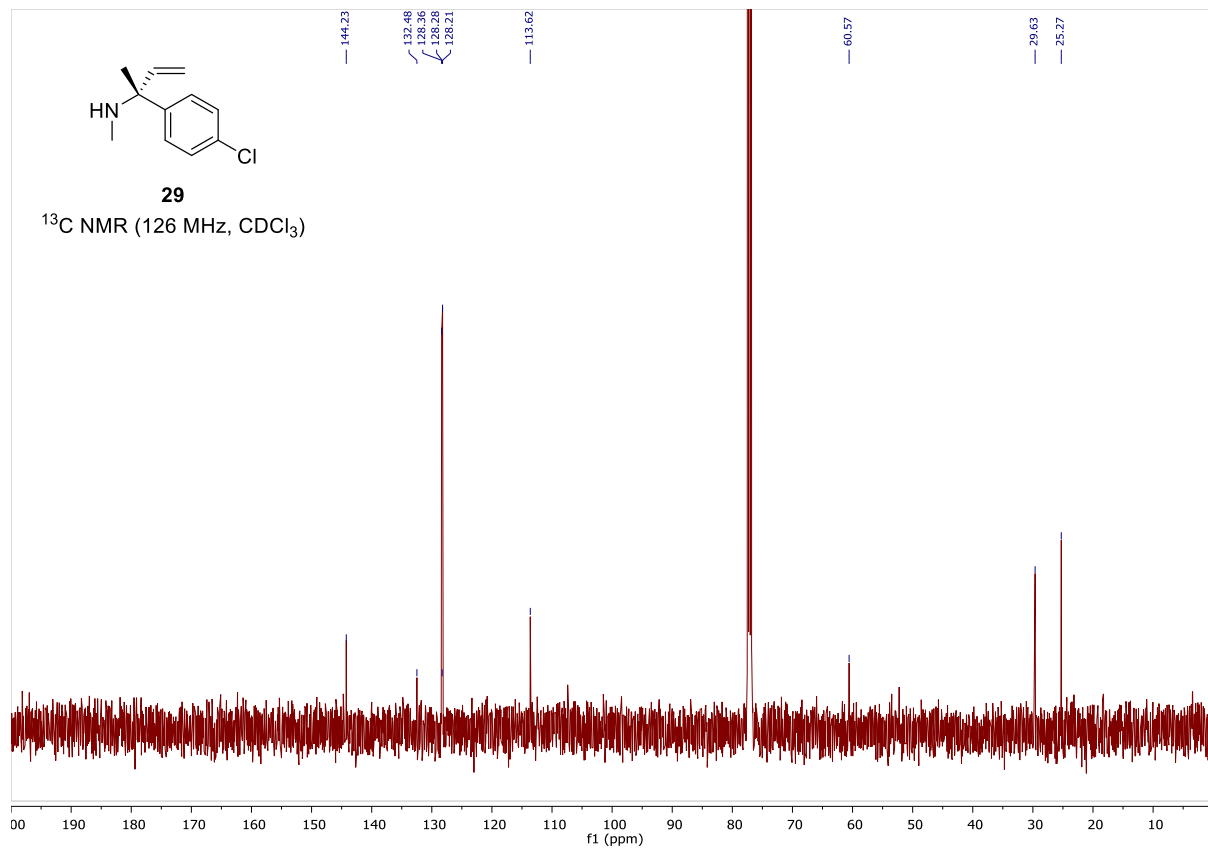

## HPLC Traces

### HPLC trace for (±)-18

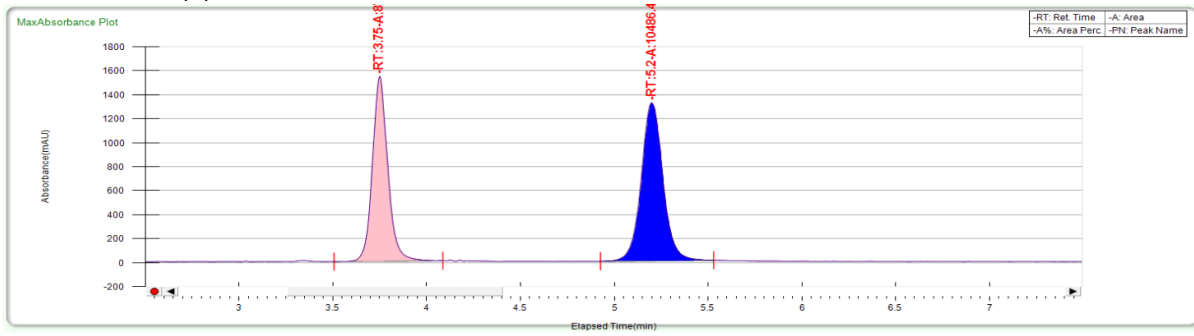

### HPLC trace for (±)-18

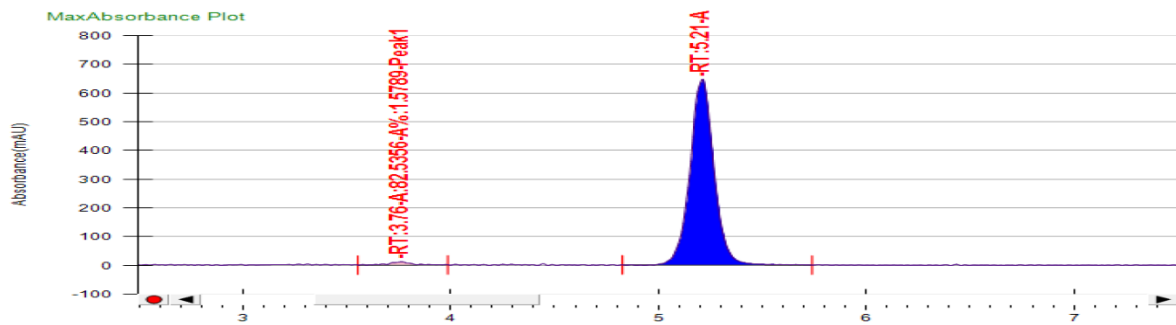

### HPLC trace for (±)-19

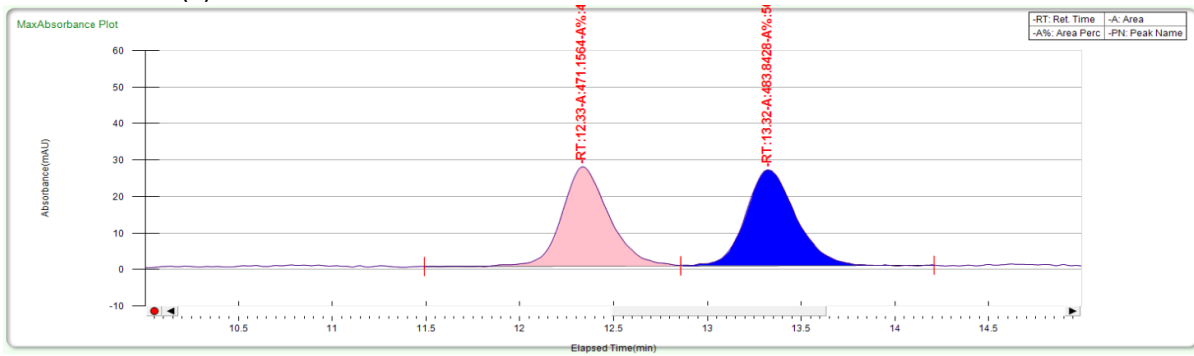

### HPLC trace for (+)-19

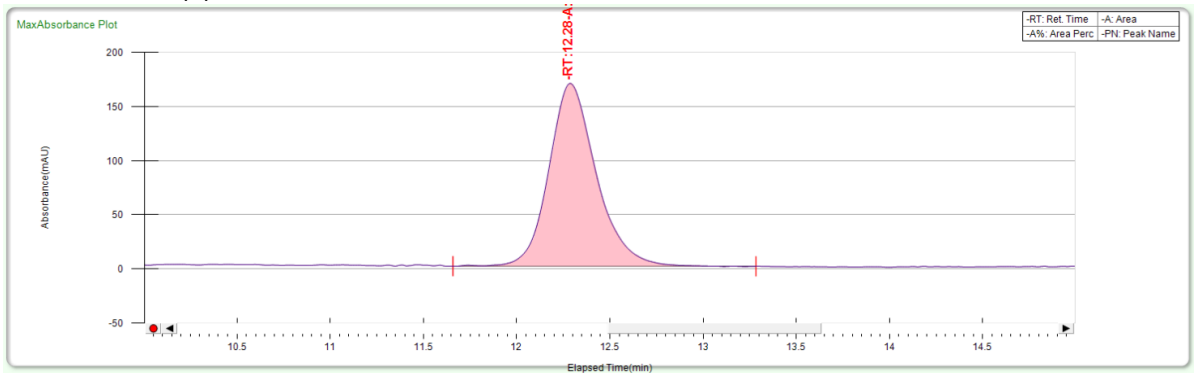

HPLC trace for ( $\pm$ )-**33**

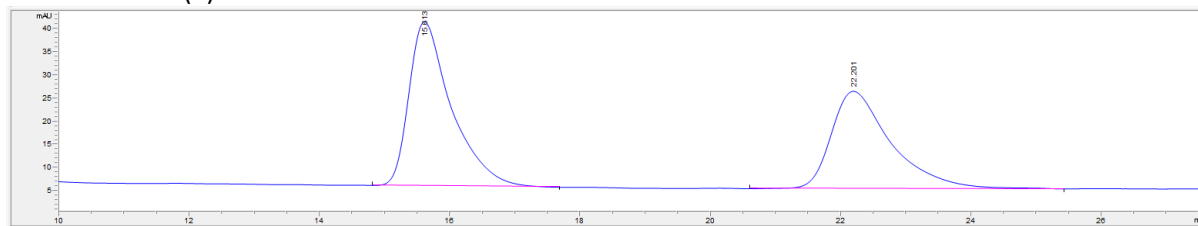

HPLC trace for enantioenriched reaction **33**

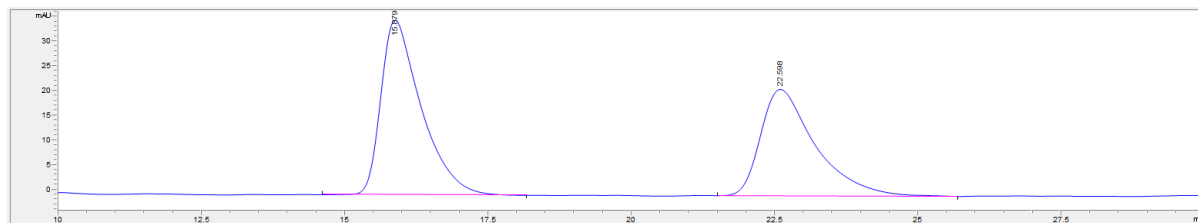

Supplement: mmc1 [file mmc1.pdf]
